# Supplementary material for: Histone methylation levels correlate with TGFBIp and extracellular matrix gene expression in normal and granular corneal dystrophy type 2 corneal fibroblasts
Source: PubMed Central journal article supplement (PMC4638082; doi:10.1186/s12920-015-0151-8), 2015-11-09
Supplement: 12920_2015_151_MOESM1_ESM.pdf [file 12920_2015_151_MOESM1_ESM.pdf]

# Supplementary Fig. 1

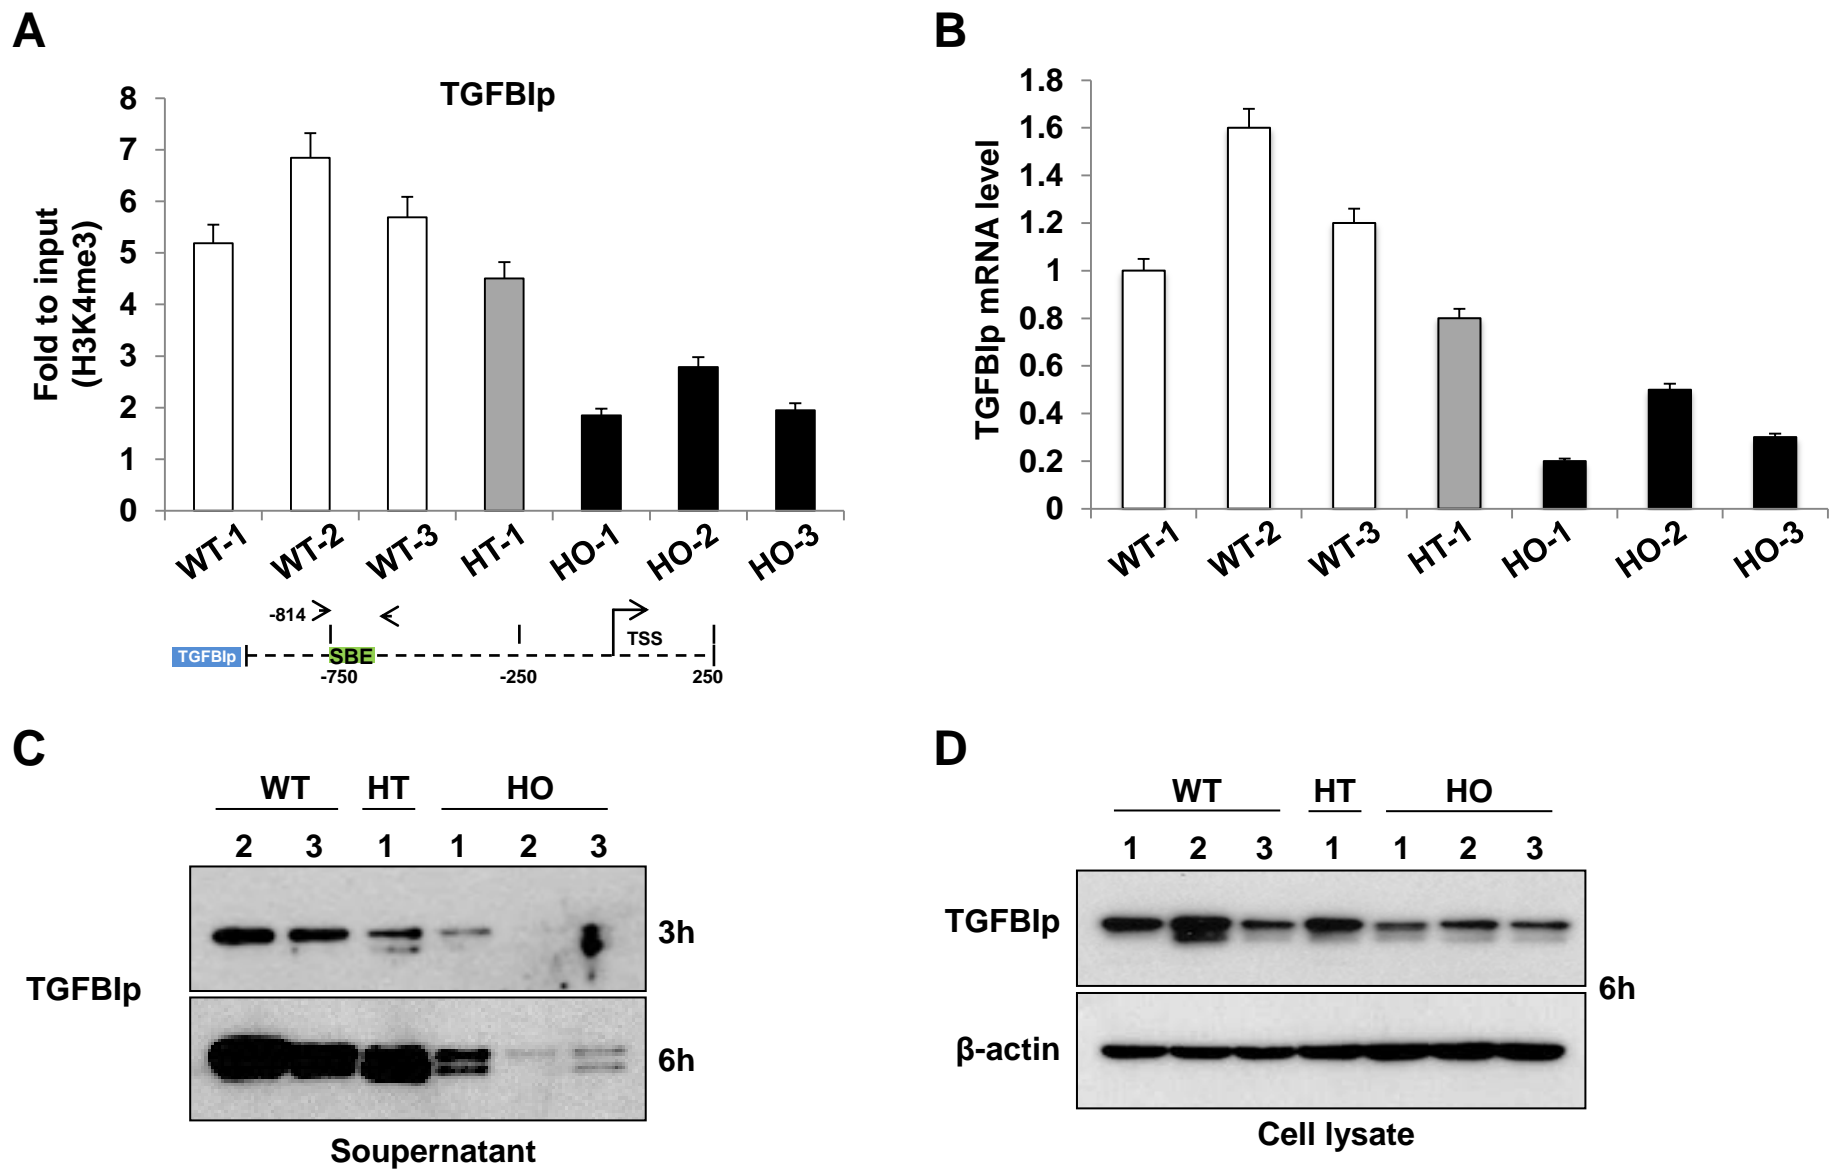

# Supplementary Fig. 2

## A Chip:

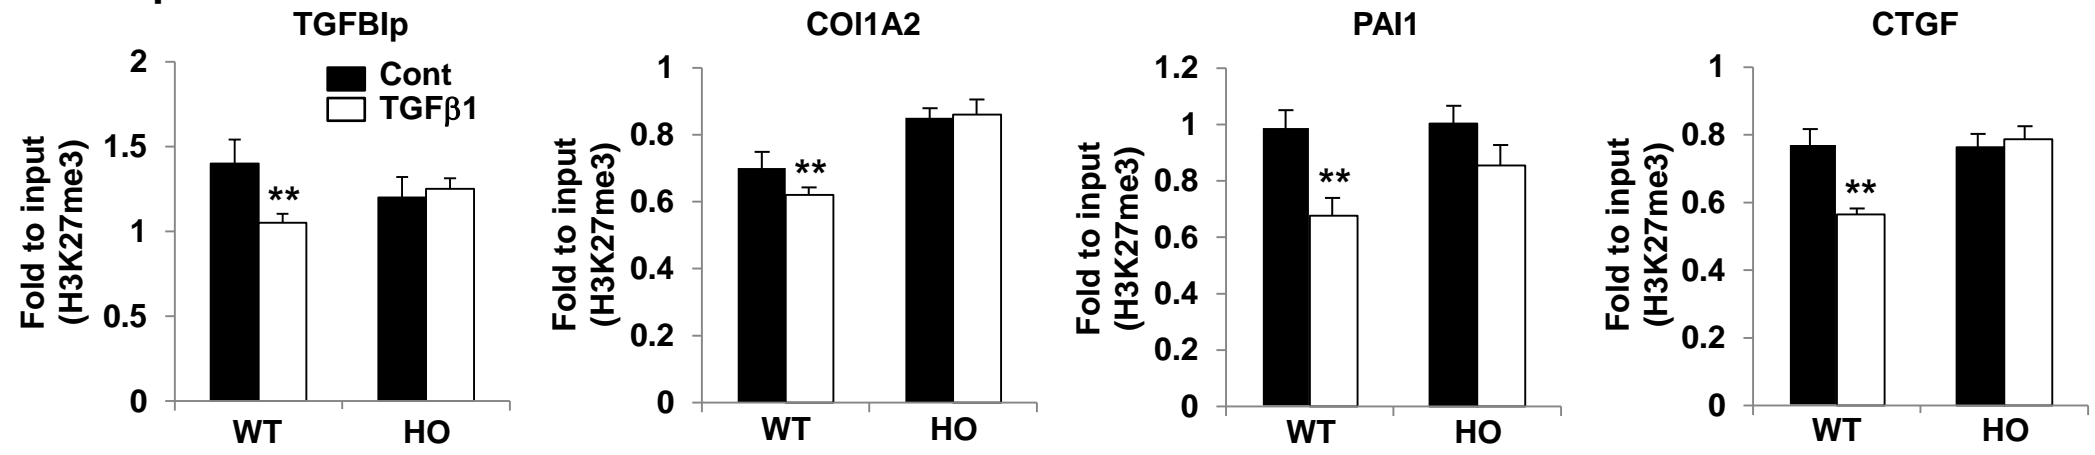

## B Chip:

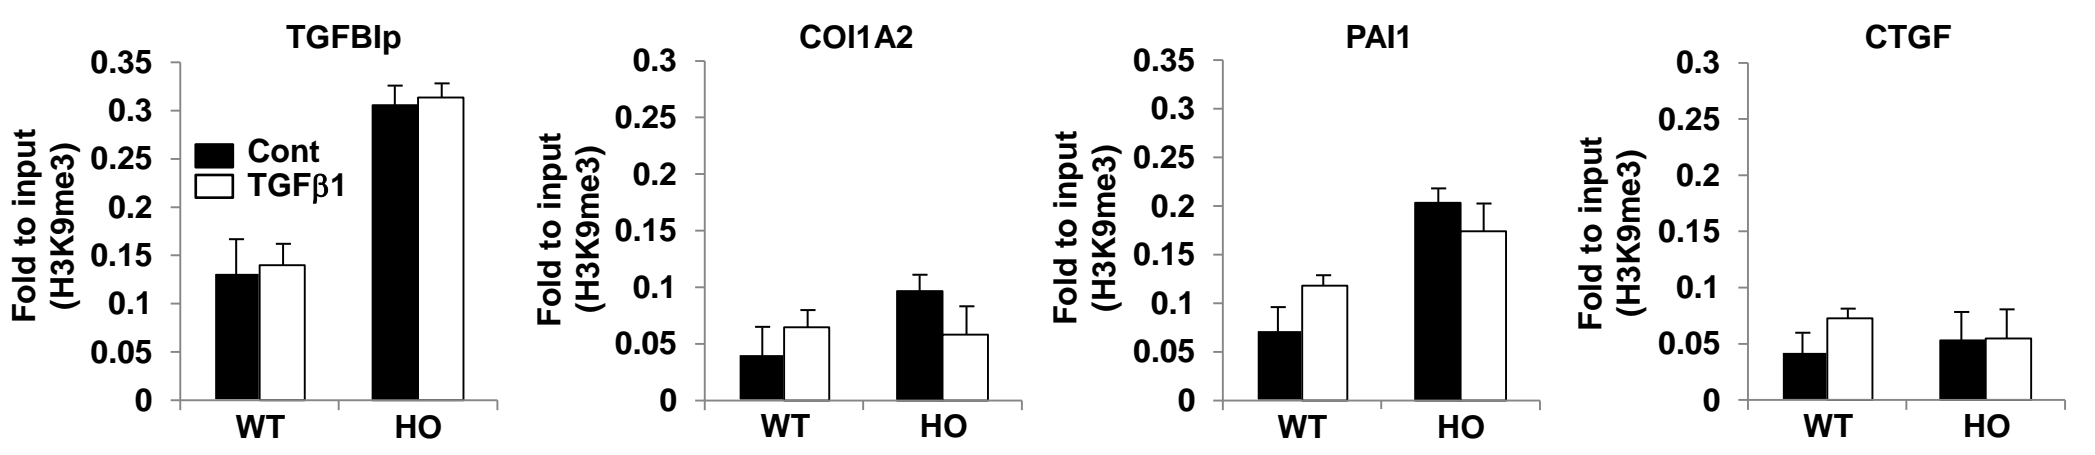

# Supplementary Fig. 3

## A

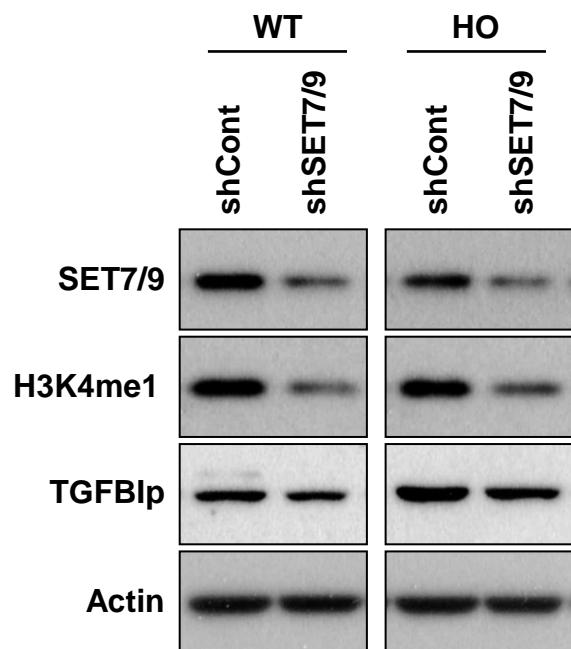

## B

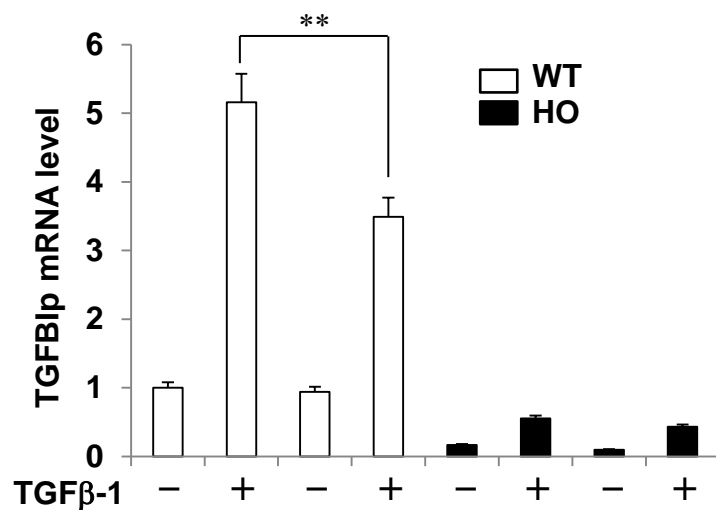

## C

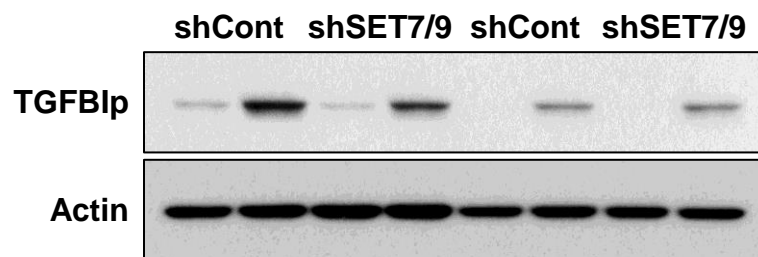

## D

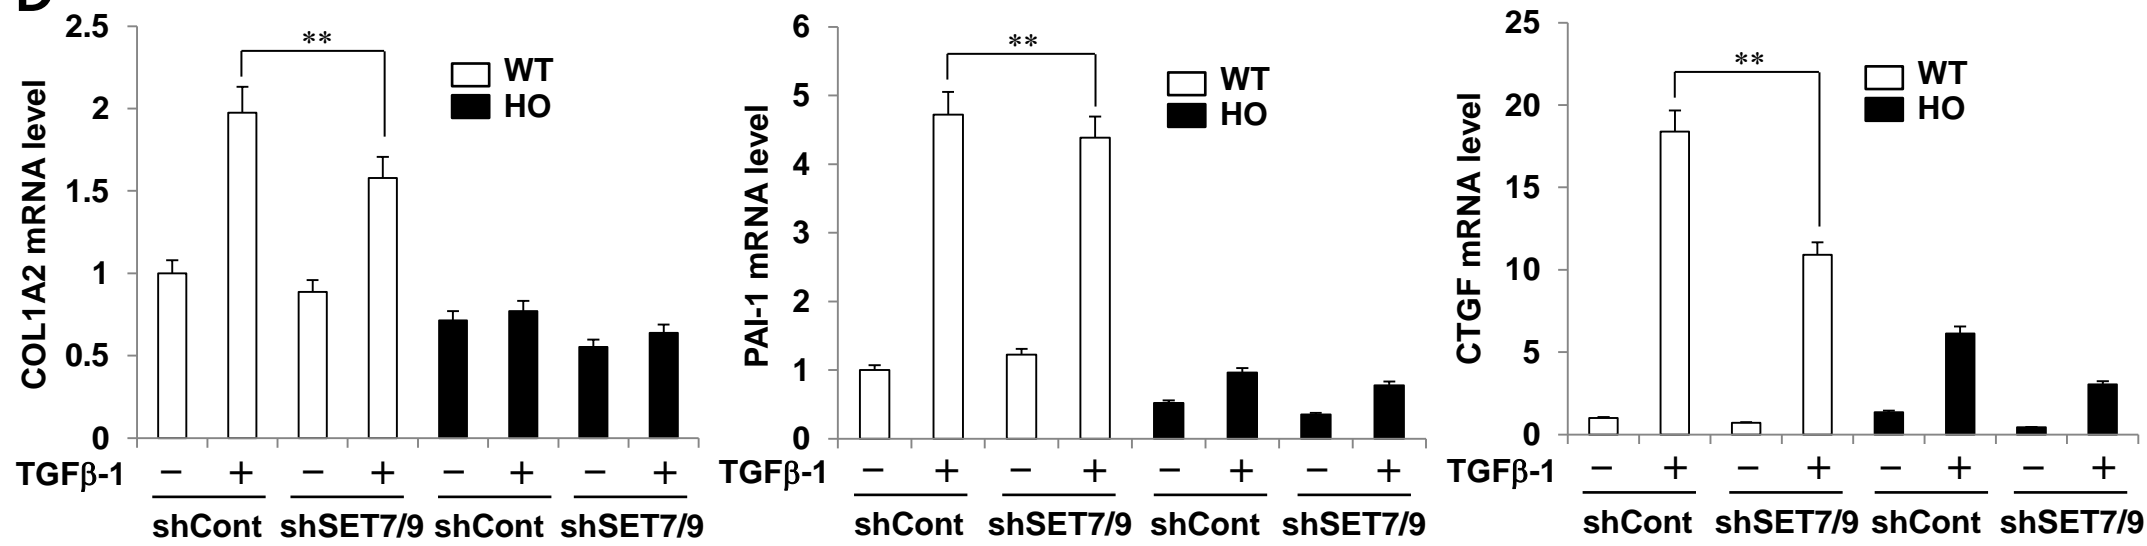

# Supplementary Fig. 4

Chip:

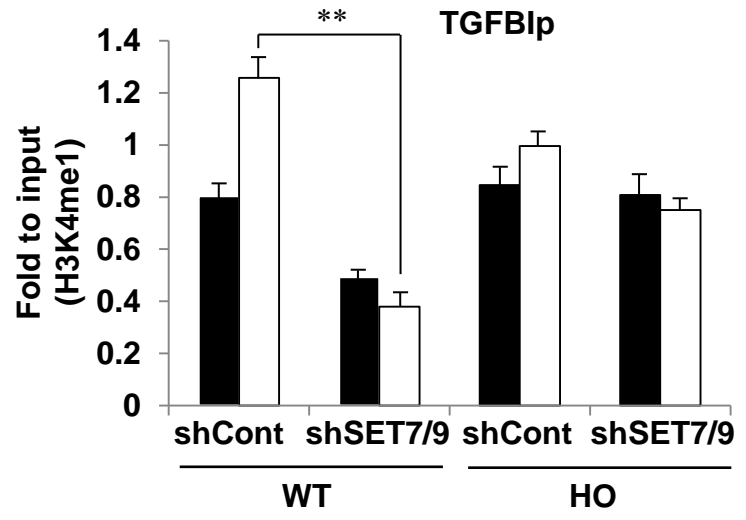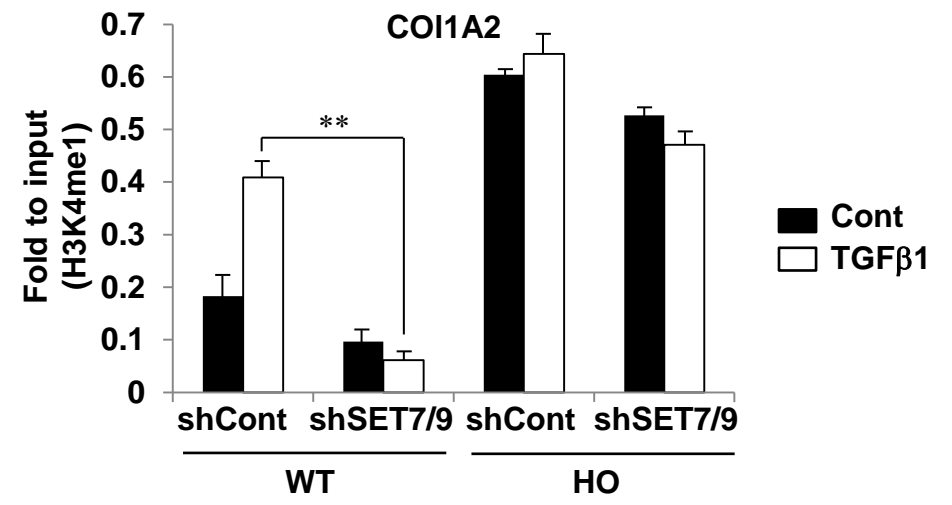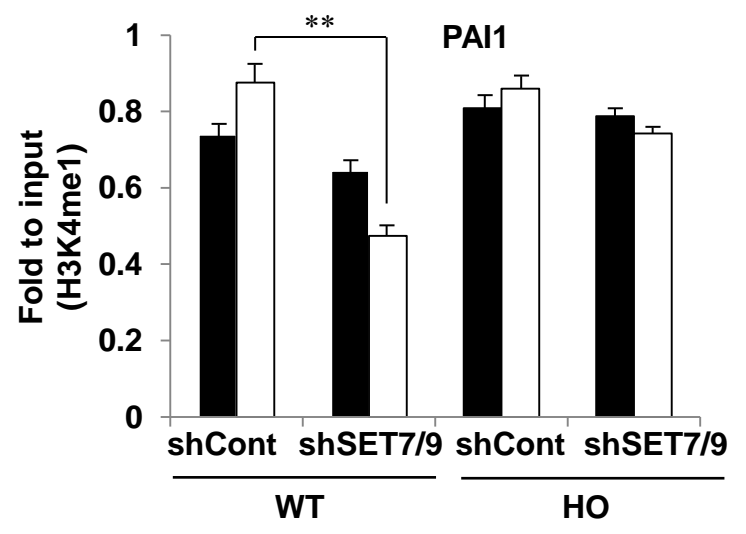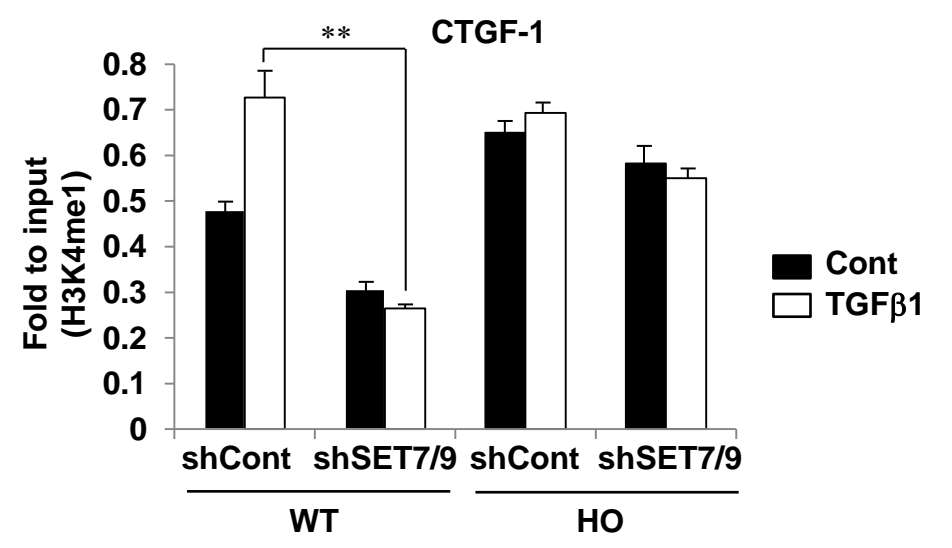

■ Cont  
□ TGFβ1

■ Cont  
□ TGFβ1
